# Supplementary material for: Re‐equilibration of imbalanced NAD metabolism ameliorates the impact of telomere dysfunction
Source: PubMed Central journal article supplement — EMBO J. 2020 Sep 16;39(21):e103420. doi: 10.15252/embj.2019103420 (PMC7604620; doi:10.15252/embj.2019103420), 2020-09-16
Supplement: EMBJ-39-e103420-s002.pdf [file EMBJ-39-e103420-s002.pdf]

## Expanded View Figures

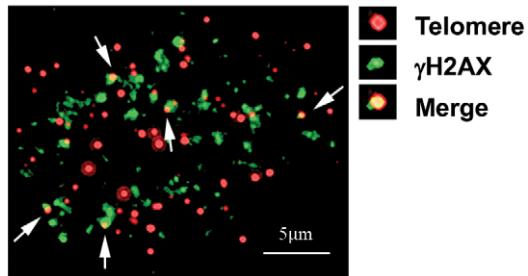

**Figure EV1. TIF formation in DC cells.**

Enlarged view of the upper right panel of Fig 6C, showing a representative image with  $\gamma$ H2AX (green) and telomere immuno-FISH (red) in a DC cell. White arrows: co-localization of  $\gamma$ H2AX foci and telomeric DNA (or TIF). Enlarged view of co-localizing foci is shown at the right panel.
